# Supplementary material for: Design and synthesis of novel pomegranate-like TiN@MXene microspheres as efficient sulfur hosts for advanced lithium sulfur batteries
Source: Royal Society of Chemistry journal article supplement (doi:10.1039/d3ra00095h), 2023-01-01
Supplement: d3ra00095h1.pdf [file d3ra00095h1.pdf]

## Supporting information

### **Design and Synthesis of Novel Pomegranate-Like TiN@MXene Microspheres as Efficient Sulfur Hosts for Advanced Lithium Sulfur batteries**

Mengjie Zhang,<sup>#a</sup> Yang Lu,<sup>1#a</sup> Zhenjie Yue,<sup>a</sup> Mengmeng Tang,<sup>a</sup> Xiaoke Luo,<sup>c</sup> Chen Chen,<sup>a</sup> Tao Peng,<sup>a</sup> Xianming Liu<sup>d</sup> and Yongsong Luo,<sup>1ab</sup>

*<sup>a</sup>Henan Joint International Research Laboratory of New Energy Storage Technology, Key Laboratory of Microelectronics and Energy of Henan Province, School of Physics and Electronic Engineering, Xinyang Normal University, Xinyang 464000, P. R. China.*

*<sup>b</sup>College of Physics and Electronic Engineering, Nanyang Normal University, Nanyang 473061, P. R. China.*

*<sup>c</sup>School of Information Engineering, Zhengzhou University, Zhengzhou 450001, P. R. China*

*<sup>d</sup>College of Chemistry and Chemical Engineering, Luoyang Normal University, Luoyang 471934, P. R. China.*

---

<sup>1</sup>Corresponding author. Tel./fax: +86 376 6390801, E-mail: [luyang.181@163.com](mailto:luyang.181@163.com) (Y. Lu), [ysluo@xynu.edu.cn](mailto:ysluo@xynu.edu.cn) (Y. S. Luo).

<sup>#</sup> Mengjie Zhang and Yang Lu contributed equally to this work.

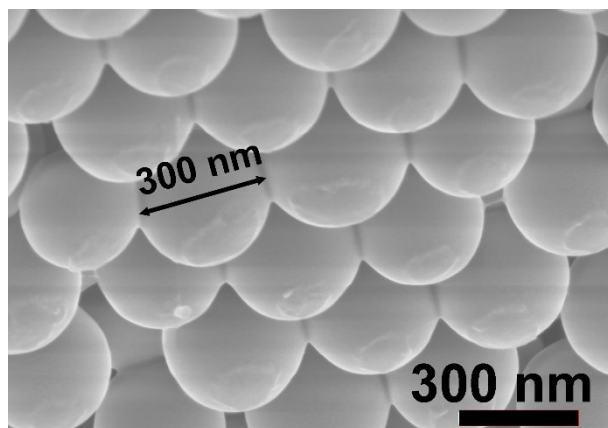

**Fig. S1** SEM image of sPS spheres.

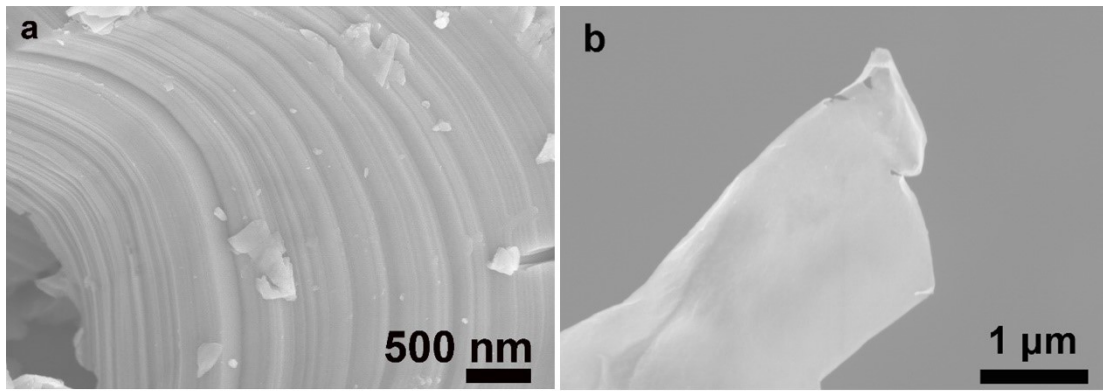

**Fig. S2** SEM images of (a) MAX and (b) Ti<sub>3</sub>C<sub>2</sub> MXene.

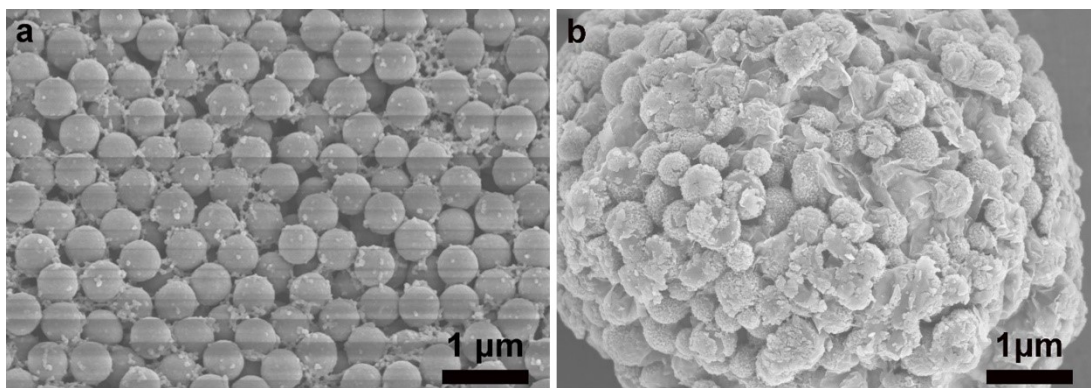

**Fig. S3** SEM images of (a) sPS@TiO<sub>2</sub> and (b) sPS@TiO<sub>2</sub>@MXene.

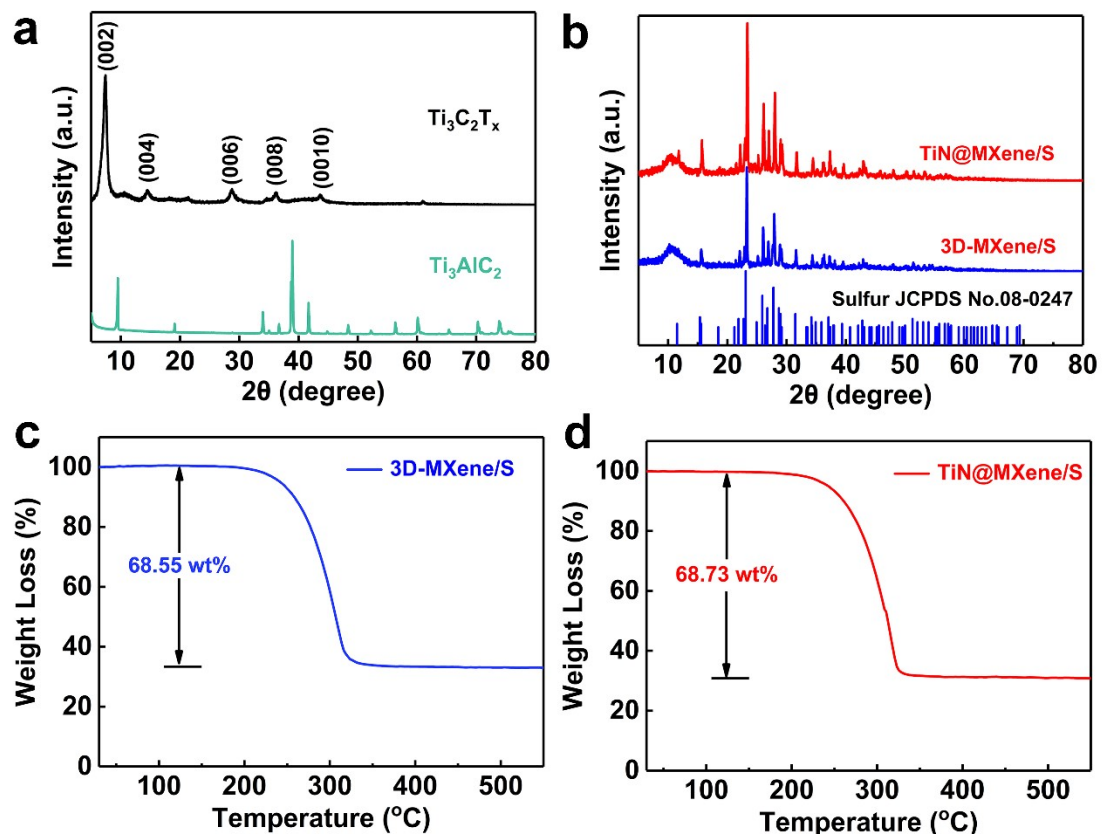

Fig. S4 (a, b) XRD patterns of the samples in synthesis experiments. (c, d) TG curves of the 3D-MXene/S and  $TiN@MXene/S$  composites.

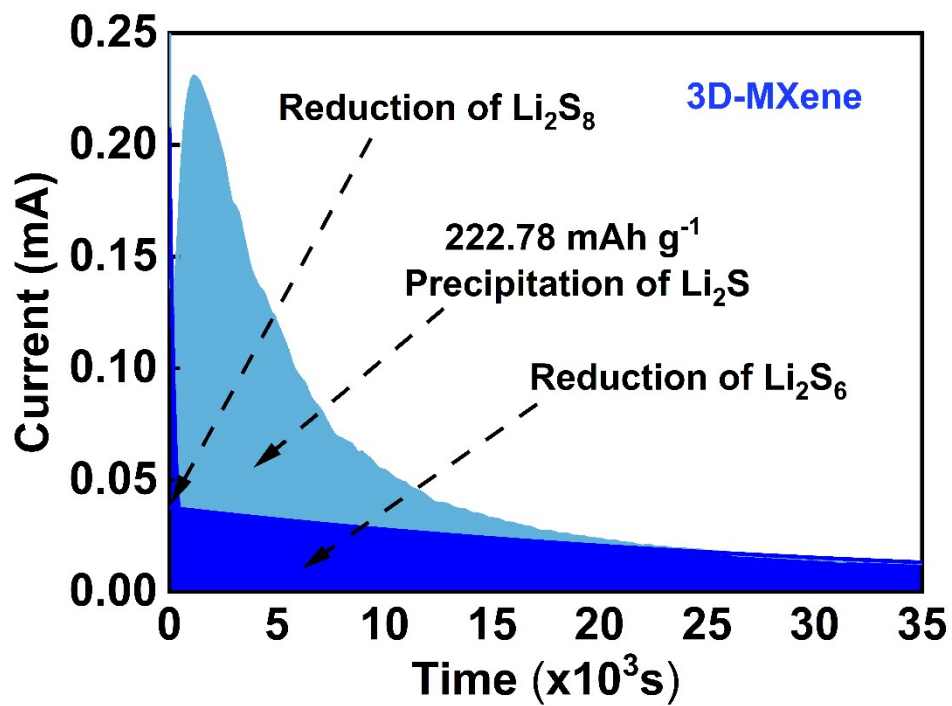

Fig. S5 Constant potential discharge curve of the Li<sub>2</sub>S deposition tests using 3D-MXene as substrate.

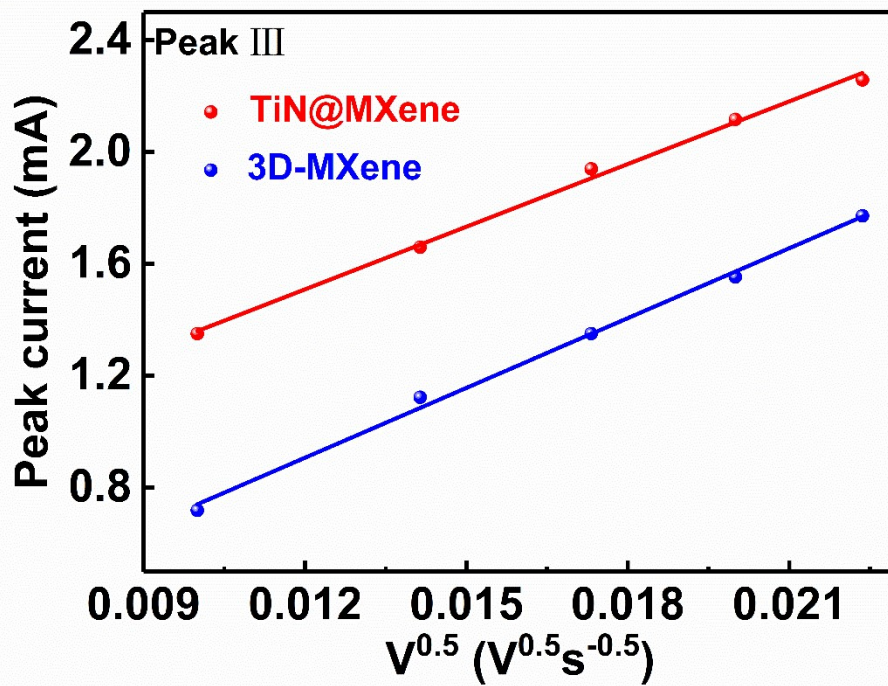

Fig. S6 The  $\text{Li}^+$  diffusion coefficient values of the TiN@MXene and 3D-MXene cathodes for the processes represented by peak III.

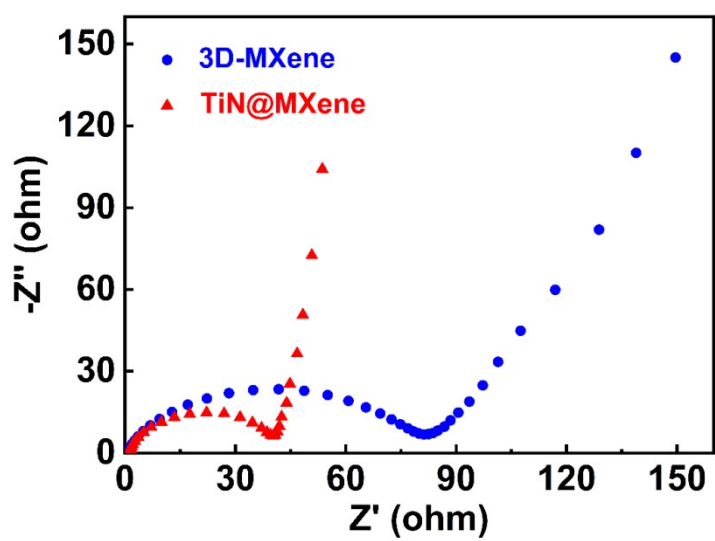

Fig. S7 EIS spectra of the 3D-MXene and TiN@MXene cathodes.



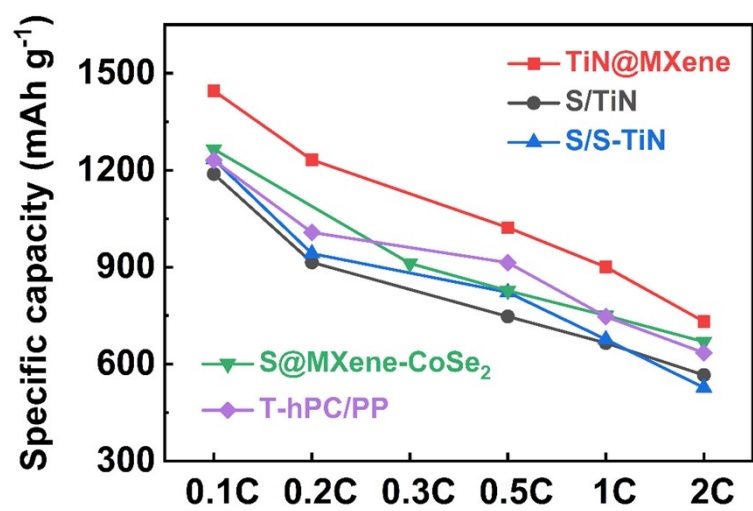

**Fig. S8** The rate performance of TiN@MXene cathode was compared with some reported cathodes based on TiN or some other catalytic materials.

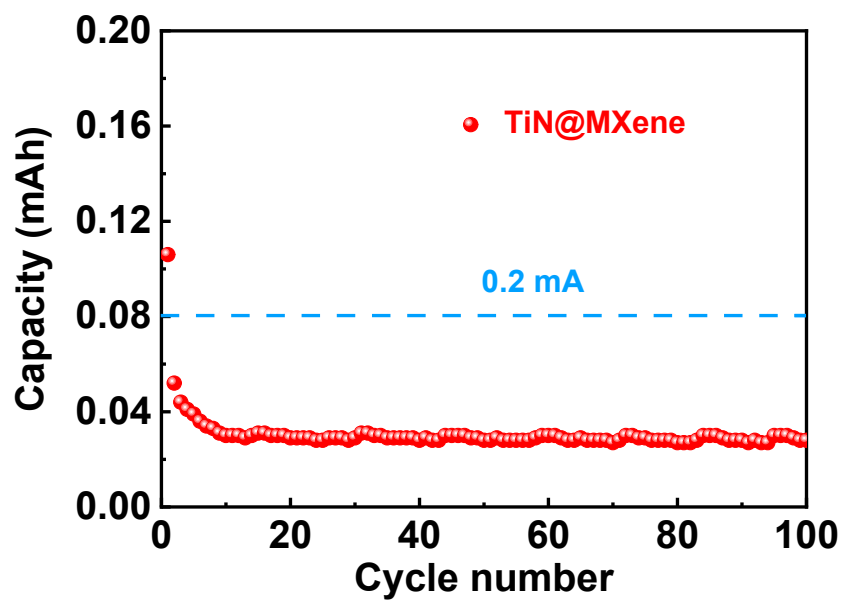

**Fig. S9** Cycling performance of TiN@MXene based cathode half-cell at 0.2 mA.

**Table S1.** Summary of  $D_{Li}$  values at peaks I, II, III for 3D-MXene and TiN@MXene cathodes.

| <b>CV Peak</b>  | <b>TiN@MXene</b>                                  | <b>3D-MXene</b>                                   |
|-----------------|---------------------------------------------------|---------------------------------------------------|
| <b>Peak I</b>   | $8.72 \times 10^{-9} \text{ cm}^2 \text{ s}^{-1}$ | $3.40 \times 10^{-9} \text{ cm}^2 \text{ s}^{-1}$ |
| <b>Peak II</b>  | $6.73 \times 10^{-9} \text{ cm}^2 \text{ s}^{-1}$ | $1.68 \times 10^{-9} \text{ cm}^2 \text{ s}^{-1}$ |
| <b>Peak III</b> | $3.18 \times 10^{-8} \text{ cm}^2 \text{ s}^{-1}$ | $2.23 \times 10^{-8} \text{ cm}^2 \text{ s}^{-1}$ |
